# Supplementary material for: DNA methylation in Arabidopsis has a genetic basis and shows evidence of local adaptation
Source: PubMed Central journal article supplement (PMC4413256; doi:10.7554/elife.05255), 2015-05-05
Supplement: elife05255s001.pdf [file elife05255s001.pdf]

Alignment of CMT2 sequences from different Accessions:

\_ref = reference (Columbia genotype) \_altA = CMT2A-nr, \_altB= CMT2B-nr

```
TAIR10      MLSPAKCESEEAQAPLDLHSSSRSEPECLSLVLWCPNPEEAAPSSTRELIKLPDNGEMSL 60
992_ref     MLSPAKCESEEAQAPLDLHSSSRSEPECLSLVLWCPNPEEAAPSSTRELIKLPDNGEMSL 60
6918_ref    MLSPAKCESEEAQAPLDLHSSSRSEPECLSLVLWCPNPEEAAPSSTRELIKLPDNGEMSL 60
6188_altA   MLSPAKCESEEAQAPLDLHSSSRSEPECLSLVLWCPNPEEAAPSSTRELIKLPDNGEMSL 60
1061_altA   MLSPAKCESEEAQAPLDLHSSSRSEPECLSLVLWCPNPEEAAPSSTRELIKLPDNGEMSL 60
6113_altB   MLSPAKCESEEAQAPLDLHSSSRSEPECLSLVLWCPNPEEAAPSSTRELIKLPDNGEMSL 60
6191_altB   MLSPAKCESEEAQAPLDLHSSSRSEPECLSLVLWCPNPEEAAPSSTRELIKLPDNGEMSL 60
*****

TAIR10      RRSTTLNCNSPEENGGEGRVSQRKSSRGKSQPLLMLTNGCQLRRSPRFRAVHANFDNVCS 120
992_ref     RRSTTLNCNSPEENGGEGRVSQRKSSRGKSQPLLMLTNGCQLRRSPRFRAVHANFDNVCS 120
6918_ref    RRSTTLNCNSPEENGGEGRVSQRKSSRGKSQPLLMLTNGCQLRRSPRFRAVHANFDNVCS 120
6188_altA   RRSTTLNCNSPEENGGEGRVSQRKSSRGKSQPLLMLTNGCQLRRSPRFRAVHANFDNVCS 120
1061_altA   RRSTTLNCNSPEENGGEGRVSQRKSSRGKSQPLLMLTNGCQLRRSPRFRAVHANFDNVCS 120
6113_altB   RRSTTLNCNSPEENGGEGRVSQRKSSRGKSQPLLMLTNGCQLRRSPRFRAVHANFDNVCS 120
6191_altB   RRSTTLNCNSPEENGGEGRVSQRKSSRGKSQPLLMLTNGCQLRRSPRFRAVHANFDNVCS 120
*****

TAIR10      VPVTKGGVSQRKFSRGKSQPLLTLTNGCQLRRSPRFRAVDGNFDSVCSVPVTGKFGSRKR 180
992_ref     VPVTEGGVSQRNNSRGKSQPLLTLTNGCQLRRSPRSRAVDGNFDSVCSVPVTGKFGSRKR 180
6918_ref    VPVTEGGVSQRNNSRGKSQPLLTLTNGCQLRRSPRFRAVDGNFDSVCSVPVTGKFGSRKR 180
6188_altA   VPVTKGGVSQRKFSRGKSQPLLTLTNGCQLRRSPRFRAVDGNFDSVCSVPVTGKFGSRKR 180
1061_altA   VPVTEGGVSQRNNSRGKSQPLLTLTNGCQLRRSPRFRAVDGNFDSVCSVPVTGKFGSRKR 180
6113_altB   VPVTEGGVSQRNNSRGKSQPLLTLTNGCQLRRSPRFKAVDGNFDSVCSVPVTGKFGSRKR 180
6191_altB   VPVTEGGVSQRNNSRGKSQPLLTLTNGCQLRRSPRFKAVDGNFDSVCSVPVTGKFGSRKR 180
***:*****: *****: *****: *****: *****: *****

TAIR10      KNSALDKKESDSEGLTFKDIAVIAKSLEMEIISECQYKNNVAEGRSRLQDPAKRKVD 240
992_ref     KNSALDKKESDSEGLTFKDIAVIAKSLEMEIISECQYKNNVAEGRSRLQDPAKRKVD 240
6918_ref    KNSALDKKESDSEGLTFKDIAVIAKSLEMEIISECQYKNNVAEGRSRLQDPAKRKVD 240
6188_altA   KNSALDKKESDSEGLTFKDIAVIAKSLEMEIISECQYKNNVAEGRSRLQDPAKRKVD 240
1061_altA   KNSALDKKESDSEGLTFKDIAVIAKSLEMEIISECQYKNNVAEGRSRLQDPAKRKVD 240
6113_altB   KNSALDKKESDSEGLTFKDIAVIAKSLEMEIISECQYKNNVAEGRSRLQDPAKRKVD 240
6191_altB   KNSALDKKESDSEGLTFKDIAVIAKSLEMEIISECQYKNNVAEGRSRLQDPAKRKVD 240
*****

TAIR10      DTLLYSSINSSKQSLGSKRMRRSRQRFMKGTENEGEENLGKSKGKMSLASCSPFRSTR 300
992_ref     DTLLYSSINSSKQSLGSKRMRRSRQRFMKGTENEGEENLGKSKGKMSLASCSPFRSTR 300
6188_ref    DTLSSSSINSSKQSLGSKRMRRSRQRFMKGTENEGEENLGKSKGKMSLASCSPFRSTR 300
6188_altA   DTLSSSSINSSKQSLGSKRMRRSRQRFMKGTENEGEENLGKSKGKMSLASCSPFRSTR 300
1061_altA   DTLSSSSINSSKQSLGSKRMRRSRQRFMKGTENEGEENLGKSKGKMSLASCSPFRSTR 300
6113_altB   DTLLYSSINSSKQSLGSKRMRRSRQRFMKGTENEGEENLGKSKGKMSLASCSPFRSTR 300
6191_altB   DTLLYSSINSSKQSLGSKRMRRSRQRFMKGTENEGEENLGKSKGKMSLASCSPFRSTR 300
*** *****.*****

TAIR10      SGTVETGNTETLNRKDCGPALCGAEQVRGTERLVQISKNDHCCAMKKCEGDGLVSSKQ 360
992_ref     SGTVETGNTETLNRKDCGPALCGAEQVRGTERLVQISKNDHCCAMKKCEGDGLVSSKQ 360
6918_ref    SGTVETGNTETLNRKDCGPALCGAEQVRGTERLVQISKNDHCCAMKKCEGDGLVSSKQ 360
6188_altA   SGTVETGNTETLNRKDCGPALCGAEQVRGTERLVQISKNDHCCAMKKCEGDGLVSSKQ 360
1061_altA   SGTVETGNTETLNRKDCGPALCGAEQVRGTERLVQISKNDHCCAMKKCEGDGLVSSKQ 360
6113_altB   SGTVETGNTETLNRKDCGPALCGAEQVRGTERLVQISKNDHCCAMKKCEGDGLVSSKQ 360
6191_altB   SGTVETGNTETLNRKDCGPALCGAEQVRGTERLVQISKNDHCCAMKKCEGDGLVSSKQ 360
*****

TAIR10      ELLVFPSGCIKKTVNGCRDRTLKGRSSGLNTDDIHTSSLKISKNDTNSGLTMTTALVEQ 420
992_ref     ELLVFPSGCIKKTVNGCRDRTLKGRSSGLNTDDIHTSSLKISKNDTNSGLTMTTALVEQ 420
6918_ref    ELLVFPSGCIKKTVNVCRDRTLKGRSSGLNTDDIHTSSLKISKNDTNSGLTMTTALVEQ 420
6188_altA   ELLVFPSGCIKKTVNVCRDRTLKGRSSGLNTDDIHTSSLKISKNGTNSGLTMTTALVEQ 420
1061_altA   ELLVFPSGCIKKTVNVCRDRTLKGRSSGLNTDDIHTSSLKISKNGTNSGLTMTTALVEQ 420
6113_altB   ELLVFPSGCIKKTVNGCRDRTLKGRSSGLNTDDIHTSSLKISKNDTNSGLTMTTALVEQ 420
6191_altB   ELLVFPSGCIKKTVNGCRDRTLKGRSSGLNTDDIHTSSLKISKNDTNSGLTMTTALVEQ 420
*****

TAIR10      DAMESLLQGKTSACGAADKGTREMHVNSTVIYLSDSDEPSSIEYLNGLDNLQVESGSAL 480
992_ref     DAMESLLQGKTSACGAADKGTREMHVNSTVIYLSDSDEPSSIEYLNGLDNLQVESGSAL 480
6918_ref    DAMESLLQGKTSACGAADKGTREMHVNSTVIYLSDSDEPSSIEYLNGLDNLQVESGSAL 480
6188_altA   DAMESLLQGKTSACGAADKGTREMHVNSTVIYLSDSDEPSSIEYLNGLDNLQVKSGSAL 480
1061_altA   DAMESLLQGKTSACGAADKGTREMHVNSTVIYLSDSDEPSSIEYLNGLDNLQVKSGSAL 480
6113_altB   DAMESLLQGKTSACGAADKGTREMHVNSTVIYLSDSDEPSSIEYLNGLDNLQVESGSAL 480
6191_altB   DAMESLLQGKTSACGAADKGTREMHVNSTVIYLSDSDEPSSIEYLNGLDNLQVESGSAL 480
*****
```

TAIR10 SSGGNEGIVSLDLNPTKSTKRKGRVTRTAVQEQNKRSICFFFIGEPLSCEEAQRWRWR 540  
992\_ref SSGGNEGIVSLDLNPTKSTNRKGRVTRTAVQEQNKRSICFFFIGEPLSCEEAQRWRWR 540  
6918\_ref SSGGNEGIVSLDLNPTKSTKRKGRVTRTAVQEQNKRSICFFFIGEPLSCEEAQRWRWR 540  
6188\_altA SSGGNEGIVSLDLNPTKSTKRKGRVTRTAVQEQNKRSICFFFIGEPLSCEEAQRWRWR 540  
1061\_altA SSGGNEGIVSLDLNPTKSTKRKGRVTRTAVQEQNKRSICFFFIGEPLSCEEAQRWRWR 540  
6113\_altB SSGGNEGIVSLDLNPTKSTKRKGRVTRTAVQEQNKRSICFFFIGEPLSCEEAQRWRWR 540  
6191\_altB SSGGNEGIVSLDLNPTKSTKRKGRVTRTAVQEQNKRSICFFFIGEPLSCEEAQRWRWR 540  
\*\*\*\*\*:\*\*\*\*\*

TAIR10 YELKERKSKSRGQOSEDDEDKIVANVECHYSQAKVDGHTFSLGDFAYIKGEEETHVGOI 600  
992\_ref YELKERKSKSRGQOSEDDEDKIVANVECHYSQAKVDGHTFSLGDFAYIKGEEETHVGOI 600  
6918\_ref YELKERKSKSRGQOSEDDEDKIVANVECHYSQAKVDGHTFSLGDFAYIKGEEETHVGOI 600  
6188\_altA YELKERKSKSRGQOSEDDEDKIVANVECHYSQAKVDGHTFSLGDFAYIKGEEETHVGOI 600  
1061\_altA YELKERKSKSRGQOSEDDEDKIVANVECHYSQAKVDGHTFSLGDFAYIKGEEETHVGOI 600  
6113\_altB YELKERKSKSRGQOSEDDEDKIVANVECHYSQAKVDGHTFSLGDFAYIKGEEETHVGOI 600  
6191\_altB YELKERKSKSRGQOSEDDEDKIVANVECHYSQAKVDGHTFSLGDFAYIKGEEETHVGOI 600  
\*\*\*\*\*:\*\*\*\*\*

**BAH Domain Y586C**

TAIR10 VEFFKTTDGESYFRVQWFYRATDTIMERQATNHDKRRLFYSTVMNDNPVCLISKVTVLQ 660  
992\_ref VEFFKTTDGESYFRVQWFYRATDTIMERQATNHDKRRLFYSTVMNDNPVCLISKVTVLQ 660  
6918\_ref VEFFKTTDGESYFRVQWFYRATDTIMERQATNHDKRRLFYSTVMNDNPVCLISKVTVLQ 660  
6188\_altA VEFFKTTDGESYFRVQWFYRATDTIMERQATNHDKRRLFYSTVMNDNPVCLISKVTVLQ 660  
1061\_altA VEFFKTTDGESYFRVQWFYRATDTIMERQATNHDKRRLFYSTVMNDNPVCLISKVTVLQ 660  
6113\_altB VEFFKTTDGESYFRVQWFYRATDTIMERQATNHDKRRLFYSTVMNDNPVCLISKVTVLQ 660  
6191\_altB VEFFKTTDGESYFRVQWFYRATDTIMERQATNHDKRRLFYSTVMNDNPVCLISKVTVLQ 660  
\*\*\*\*\*:\*\*\*\*\*

TAIR10 VSPRVGLKPNISIKSDYYFMEYCVVEYSTFQTLRNPKTSENKLECCADVVPTESTESILKK 720  
992\_ref VSPRAGLKPNISIKSDYYFMEYCVVEYSTFQTLRNPKTSENKLECWADVVPTESTESILKK 720  
6918\_ref VSPRAGLKPNISIKSDYYFMEYCVVEYSTFQTLRNPKTSENKLECCADVVPKSTESILKK 720  
6188\_altA VSPRAGLKPNISIKSDYYFMEYCVVEYSTFQTLRNPKTSENKLECCADVVPTESTESILKK 720  
1061\_altA VSPRAGLKPNISIKSDYYFMEYCVVEYSTFQTLRNPKTSENKLECCADVVPTESTESILKK 720  
6113\_altB VSPRAGLKPNISIKSDYYFMEYCVVEYSTFQTLRNPKTSENKLECCADVVPKSTESILKK 720  
6191\_altB VSPRAGLKPNISIKSDYYFMEYCVVEYSTFQTLRNPKTSENKLECCADVVPKSTESILKK 720  
\*\*\*:\*\*\*\*\*

TAIR10 KFSFGELPVLDLYSGCGGMSTGLSLGAKISGVDVVTKWAVDQNTAACKSLKLNHPNTQVR 780  
992\_ref KFSFGELPVLDLYSGCGGMSTGLSLGAKISGVDVVTKWAVDQNTAACKSLKLNHPNTQVR 780  
6918\_ref KFSFGELPVLDLYSGCGGMSTGLSLGAKISGVDVVTKWAVDQNTAACKSLKLNHPNTQVR 780  
6188\_altA KFSFGELPVLDLYSGCGGMSTGLSLGAKISGVDVVTKWAVDQNTAACKSLKLNHPNTQVR 780  
1061\_altA KFSFGELPVLDLYSGCGGMSTGLSLGAKISGVDVVTKWAVDQNTAACKSLKLNHPNTQVR 780  
6113\_altB KFSFGELPVLDLYSGCGGMSTGLSLGAKISGVDVVTKWAVDQNTAACKSLKLNHPNTQVR 780  
6191\_altB KFSFGELPVLDLYSGCGGMSTGLSLGAKISGVDVVTKWAVDQNTAACKSLKLNHPNTQVR 780  
\*\*\*\*\*:\*\*\*\*\*

TAIR10 NDAAGDFLQLLKEWDKLCRYVFNNQRTDTLRSVNSTKETSESSSSDDSDSEEEYEVE 840  
992\_ref NDAAGDFLQLLKEWDKLCRYVFNNQRTDTLRSVNSTKETSESSSSDDSDSEEEYEVE 840  
6918\_ref NDAAGDFLQLLKEWDKLCRYVFNNQRTDTLRSVNSTKETSESSSSDDSDSEEEYEVE 840  
6188\_altA NDAAGDFLQLLKEWDKLCRYVFNNQRTDTLRSVNSTKETSESSSSDDSDSEEEYEVE 840  
1061\_altA NDAAGDFLQLLKEWDKLCRYVFNNQRTDTLRSVNSTKETSESSSSDDSDSEEEYEVE 840  
6113\_altB NDSAGDFLQLLKEWDKLCRYVFNNQRTDTLRSVNSTKETSESSSSDDSDSEEEYEVE 840  
6191\_altB NDSAGDFLQLLKEWDKLCRYVFNNQRTDTLRSVNSTKETSESSSSDDSDSEEEYEVE 840  
\*\*:\*\*\*\*\*

**CHROMO Domain**

TAIR10 KLVDICFGDPDKTGKNGLKFVHWKGYRSEDDETWELAEELSNCQDAIREFVTSGFKSKIL 900  
992\_ref KLVDICFGDPDKTGKNGLKFVHWKGYRSEDDETWELAEELSNCQDAIREFVTSGFKSKIL 900  
6918\_ref KLVDICFGDPDKTGKNGLKFVHWKGYRSEDDETWELAEELSNCQDAIREFVTSGFKSKIL 900  
6188\_altA KLVDICFGDPDKTGKNGLKFVHWKGYRSEDDETWELAEELSNCQDAIREFVTSGFKSKIL 900  
1061\_altA KLVDICFGDPDKTGKNGLKFVHWKGYRSEDDETWELAEELSNCQDAIREFVTSGFKSKIL 900  
6113\_altB KLVDICFGDPDKTGKNGLKFVHWKGYRSEDDETWELAEELSNCQDAIREFVTSGFKSKIL 900  
6191\_altB KLVDICFGDPDKTGKNGLKFVHWKGYRSEDDETWELAEELSNCQDAIREFVTSGFKSKIL 900  
\*\*\*\*\*:\*\*\*\*\*

**C5 Methyltransferase Domain**

TAIR10 PLPGRVGVICGGPPCQGISGYNRHRNVDSPLNDRNQIIVFMDIVEYLKPSYVLMENVV 960  
992\_ref PLPGRVGVICGGPPCQGISGYNRHRNVDSPLNDRNQIIVFMDIVEYLKPSYVLMENVV 960  
6918\_ref PLPGRVGVICGGPPCQGISGYNRHRNVDSPLNDRNQIIVFMDIVEYLKPSYVLMENVV 960  
6188\_altA PLPGRVGVICGGPPCQGISGYNRHRNVDSPLNDRNQIIVFMDIVEYLKPSYVLMENVV 960  
1061\_altA PLPGRVGVICGGPPCQGISGYNRHRNVDSPLNDRNQIIVFMDIVEYLKPSYVLMENVV 960  
6113\_altB PLPGRVGVICGGPPCQGISGYNRHRNVDSPLNDE NQOIIVFMDIVEYLKPSYVLMENVV 960  
6191\_altB PLPGRVGVICGGPPCQGISGYNRHRNVDSPLNDE NQOIIVFMDIVEYLKPSYVLMENVV 960  
\*\*\*\*\*:\*\*\*\*\*

**R934K**

TAIR10 DILRMDKGSGLGRYALSRLVMRYQARLGIMTAGCYGLSQFRSRVFMWGA VPKNLPFPPL 1020  
992\_ref DILRMDKGSGLGRYALSRLVMRYQARLGIMTAGCYGLSQFRSRVFMWGA VPKNLPFPPL 1020  
6918\_ref DILRMDKGSGLGRYALSRLVMRYQARLGIMTAGCYGLSQFRSRVFMWGA VPKNLPFPPL 1020  
6188\_altA DILRMDKGSGLGRYALSRLVMRYQARLGIMTAGCYGLSQFRSRVFMWGA VPKNLPFPPL 1020  
1061\_altA DILRMDKGSGLGRYALSRLVMRYQARLGIMTAGCYGLSQFRSRVFMWGA VPKNLPFPPL 1020  
6113\_altB DILRMDKGSGLGRYALSRLVMRYQARLGIMTAGCYGLSQFRSRVFMWGA VPKNLPFPPL 1020  
6191\_altB DILRMDKGSGLGRYALSRLVMRYQARLGIMTAGCYGLSQFRSRVFMWGA VPKNLPFPPL 1020  
\*\*\*\*\*:\*\*\*\*\*

TAIR10 PTHDVIVRYGLPLEFERNVVAYAEGQPRKLEKALVLKDAISDLPHVSNDEDREKLPYESL 1080  
992\_ref PTHDVIVRYGLPLEFERNVVAYAEGQPRKLEKALVLKDAISDLPHVSNDEDREKLPYESL 1080  
6188\_ref PTHDVIVRYGLPLEFERNVVAYAEGQPRKLEKALVLKDAISDLPHVSNDEDREKLPYESL 1080  
6188\_altA PTHDVIVRYGLPLEFERNVVAYAEGQPRKLEKALVLKDAISDLPHVSNDEDREKLPYESL 1080  
1061\_altA PTHDVIVRYGLPLEFERNVVAYAEGQPRKLEKALVLKDAISDLPHVSNDEDREKLPYESL 1080  
6113\_altB PTHDVIVRYGLPLEFERNVVAYAEGQPRKLEKALVLKDAISDLPHVSN EDREKLPYESL 1080  
6191\_altB PTHDVIVRYGLPLEFERNVVAYAEGQPRKLEKALVLKDAISDLPHVSN EDREKLPYESL 1080  
\*\*\*\*\*:\*\*\*\*\*

**D1068E**

TAIR10 PKTDFQRYIRSTKRDLTGSAIDNCNKRTMLLHDHRPFHINEDDYARVCQIPKRKGANFRD 1140  
992\_ref PKTDFQRYIRSTKRDLTGSAIDNCNKRTMLLHDHRPFHINEDDYARVCQIPKRKGANFRD 1140  
6188\_ref PKTDFQRYIRSTKRDLTGSAIDNCNKRTMLLHDHRPFHINEDDYARVCQIPKRKGANFRD 1140  
6188\_altA PKTDFQRYIRSTKRDLTGSAIDNCNKRTMLLHDHRPFHINEDDYARVRIIPKRKGANFRD 1140  
1061\_altA PKTDFQRYIRSTKRDLTGSAIDNCNKRTMLLHDHRPFHINEDDYARVRIIPKRKGANFRD 1140  
6113\_altB PKTDFQRYIRSTKRDLTGSAIDNCNKRTMLLHDHRPFHINEDDYARVCQIPKRKGANFRD 1140  
6191\_altB PKTDFQRYIRSTKRDLTGSAIDNCNKRTMLLHDHRPFHINEDDYARVCQIPKRKGANFRD 1140  
\*\*\*\*\*

**C1127R**

TAIR10 LPGLIVRNNTVCRDPSMEPVILPSGKPLVPGYVFTFQQGKSKRPFARLWDETVPTVLTV 1200  
992\_ref LPGLIVRNNTVCRDPSMEPVILPSGKPLVPGYVFTFQQGKSKRPFARLWDETVPTVLTV 1200  
6188\_ref LPGLIVRNNTVCRDPSMEPVILPSGKPLVPGYVFTFQQGKSKRPFARLWDETVPTVLTV 1200  
6188\_altA LPGLIVRNNTVCRDPSMEPVILPSGKPLVPGYVFTFQQGKSKRPFARLWDETVPTVLTV 1200  
1061\_altA LPGLIVRNNTVCRDPSMEPVILPSGKPLVPGYVFTFQQGKSKRPFARLWDETVPTVLTV 1200  
6113\_altB LPGLIVRNNTVCRDPSMEPVILPSGKPLVPGYVFTFQQGKSKRPFARLWDETVPTVLTV 1200  
6191\_altB LPGLIVRNNTVCRDPSMEPVILPSGKPLVPGYVFTFQQGKSKRPFARLWDETVPTVLTV 1200  
\*\*\*:\*\*\*\*\*

TAIR10 PTCHSQALLHPEQDRVLTIRE SARLQGFDPDYFQFCGTIKERYCQIGNAVAVSVSRALGYS 1260  
992\_ref PTCHSQALLHPEQDRVLTIRE SARLQGFDPDYFQFCGTIKERYCQIGNAVAVSVSRALGYS 1260  
6188\_ref PTCHSQALLHPEQDRVLTIRE SARLQGFDPDYFQFCGTIKERYCQIGNAVAVSVSRALGYS 1260  
6188\_altA PTCHSQALLHPEQDRVLTIRE SARLQGFDPDYFQFCGTIKERYCQIGNAVAVSVSRALGYS 1260  
1061\_altA PTCHSQALLHPEQDRVLTIRE SARLQGFDPDYFQFCGTIKERYCQIGNAVAVSVSRALGYS 1260  
6113\_altB PTCHSQALLHPEQDRVLTIRE SARLQGFDPDYFQFCGTIKERYCQIGNAVAVSVSRALGYS 1260  
6191\_altB PTCHSQALLHPEQDRVLTIRE SARLQGFDPDYFQFCGTIKERYCQIGNAVAVSVSRALGYS 1260  
\*\*\*\*\*

TAIR10 LGMAFRGLARDEHLIKLPQNFSSHSTYPQLQETIPH 1295  
992\_ref LGMAFRGLARDEHLIKLPQNFSSHSTYPQLQETIPH 1295  
6188\_ref LGMAFRGLARDEHLIKLPQNFSSHSTYPQLQETIPH 1295  
6188\_altA LGMAFRGLARDEHLIKLPQNFSSHSTYPQLQETIPH 1295  
1061\_altA LGMAFRGLARDEHLIKLPQNFSSHSTYPQLQETIPH 1295  
6113\_altB LGMAFRGLARDEHLIKLPQNFSSHSTYPQLQEAIPH 1295  
6191\_altB LGMAFRGLARDEHLIKLPQNFSSHSTYPQLQEAIPH 1295  
\*\*\*\*\*:\*\*\*
